# Supplementary material
Source: publisher figshare collection journal article supplement (https://plos.figshare.com/articles/dataset/_/7427549)
Supplement: Supplementary file [file 1]

# S1 Table. Samples analyzed.

Investigated taxa, collecting information, GenBank accession numbers (235 *atpB-rbcL* sequences, 136 *rpl32-trnL* sequences; N/A = not available), biogeographic distribution and trait values (life-form, leaf whorls, corolla type, pollen type, fruit consistence and fruit indumentum with respect to uncinata hairs).

| Taxon (sample number)                           | Locality (voucher information) <sup>a</sup>                                       | GenBank accession numbers |            | Distribution     | Life form | Elements per leaf whorl | Corolla | Pollen      | Fruit consistence | Uncinate hairs on fruits |
|-------------------------------------------------|-----------------------------------------------------------------------------------|---------------------------|------------|------------------|-----------|-------------------------|---------|-------------|-------------------|--------------------------|
|                                                 |                                                                                   | atpB-rbcL                 | rpl32-trnL |                  |           |                         |         |             |                   |                          |
| outgroups                                       |                                                                                   |                           |            |                  |           |                         |         |             |                   |                          |
| <i>Putoria calabrica</i> (L. f.) DC. (53M_GB36) | Greece: Ionian Islands (WU, G: FE 930409-2301)                                    | MK028086                  | N/A        | Mediterranean    | perennial | 2 + 2 small stipules    | tubular | 3-colpate   | fleshy            | no                       |
| <i>Theligonum cynocrambe</i> L. (67M)           | Greece: Ionian Islands (WU: FE 930416-6201)                                       | MK028091                  | N/A        | Mediterranean    | annual    | 2 + 2 small stipules    | rotate  | polyporate  | dry               | no                       |
| Asperula                                        |                                                                                   |                           |            |                  |           |                         |         |             |                   |                          |
| sect. Asperula                                  |                                                                                   |                           |            |                  |           |                         |         |             |                   |                          |
| <i>A. arvensis</i> L. (137M)                    | Cyprus: Ayia-Anna, Vyzakia (G: Iter Mediterranea IV 1479, Cyprus)                 | MK028049                  | N/A        | Mediterranean    | annual    | 6 or more               | tubular | polycolpate | dry               | no                       |
| <i>A. orientalis</i> Boiss. & Hohen. (78M)      | Switzerland: Geneva, Bot. Garden (G: A. Natali s.n., Geneva Bot. Garden 780237/0) | MK028097                  | N/A        | SW Asia          | annual    | 6 or more               | tubular | polycolpate | dry               | no                       |
| <i>A. taurina</i> L. (119M)                     | Central Europe (no herbarium voucher)                                             | MK028034                  | N/A        |                  |           |                         |         |             |                   |                          |
| <i>A. taurina</i> L. (84)                       | Switzerland: Zürich, Bot. Garden (WU: FE, 2.6.2001)                               | MK027952                  | MK027815   | Europe & SW Asia | perennial | 4                       | tubular | polycolpate | dry               | no                       |
| <i>A. taurina</i> L. (R276M)                    | Italy: Prov. Cuneo (G: A. Charpin 23296)                                          | MK028110                  | N/A        |                  |           |                         |         |             |                   |                          |
| sect. Cruciana                                  |                                                                                   |                           |            |                  |           |                         |         |             |                   |                          |
| <i>A. prostrata</i> (Adams) K.Koch (88)         | Georgia: Caucasus, Kasbegi (WU: FE, July 1997)                                    | MK027954                  | MK027819   | SW Asia          | perennial | 6 or more               | tubular | polycolpate | dry               | no                       |
| sect. Cynanchicae                               |                                                                                   |                           |            |                  |           |                         |         |             |                   |                          |
| <i>A. accrescens</i> Klokov (91)                | Georgia: Caucasus, Kasbegi (WU: FE, July 1997)                                    | MK027956                  | MK027822   | SW Asia          | perennial | 4                       | tubular | polycolpate | dry               | no                       |

|                                                                                                     |                                                                                                          |          |          |               |           |   |         |             |     |    |
|-----------------------------------------------------------------------------------------------------|----------------------------------------------------------------------------------------------------------|----------|----------|---------------|-----------|---|---------|-------------|-----|----|
| <i>A. aristata</i> L. f.<br>(509M)                                                                  | Italy: Sicilia, Palermo,<br>Monte Rosa (PAL: L.<br>Robba 2, Oct. 2003)                                   | MK028083 | N/A      | Mediterranean | perennial | 4 | tubular | polycolpate | dry | no |
| <i>A. crassifolia</i> L. (102)                                                                      | Italy: Capri (WU: FE,<br>10.11.2000 [as<br>"A.tomentosa Ten."])                                          | MK027963 | MK027833 |               |           |   |         |             |     |    |
| <i>A. crassifolia</i> L. (95)                                                                       | Italy: Capri (WU: FE,<br>10.11.2000)                                                                     | MK027959 | MK027826 | Mediterranean | perennial | 4 | tubular | polycolpate | dry | no |
| <i>A. cynanchica</i> L.<br>(506M)                                                                   | Italy: Sicilia, Palermo,<br>Madonie (PAL: L. Robba<br>14)                                                | MK028080 | N/A      |               |           |   |         |             |     |    |
| <i>A. cynanchica</i> L.<br>(81M_GB22_222)                                                           | Switzerland: Geneva, Bot.<br>Garden (G: A. Natali & J.-F.<br>Manen s.n., Geneva Bot.<br>Garden 861771/0) | MK028100 | N/A      | Europe        | perennial | 4 | tubular | polycolpate | dry | no |
| <i>A. deficiens</i> Viv.<br>(124M)                                                                  | Italy: Sardinia, Tavolara (G:<br>Corrias & Diana s.n.)                                                   | MK028040 | N/A      | Mediterranean | perennial | 4 | tubular | polycolpate | dry | no |
| <i>A. gussonei</i> Boiss.<br>(82M_GB21)                                                             | Switzerland: Geneva, Bot.<br>Garden (G: A. Natali & J.-F.<br>Manen s.n., Geneva Bot.<br>Garden 783214/0) | MK028101 | N/A      | Mediterranean | perennial | 4 | tubular | polycolpate | dry | no |
| <i>A. paui</i> Font Quer<br>subsp. <i>paui</i> (R275M)                                              | Spain: Balears, Ibiza, San<br>Mateo (G, GE: Font Quer<br>2887)                                           | MK028109 | N/A      | Mediterranean | perennial | 4 | tubular | polycolpate | dry | no |
| <i>A. paui</i> subsp.<br><i>dianensis</i> (Font Quer)<br>De la Torre, Alcaraz &<br>M.B. Crespo (90) | Spain: Alicante, Cabo de<br>San Antalio (WU: M.<br>Boşcaiu)                                              | MK027955 | MK027821 | Mediterranean | perennial | 4 | tubular | polycolpate | dry | no |

#### sect. *Dioicae*

|                                     |                                                                                 |          |          |           |           |           |         |             |     |    |
|-------------------------------------|---------------------------------------------------------------------------------|----------|----------|-----------|-----------|-----------|---------|-------------|-----|----|
| <i>A. conferta</i> Hook. f.<br>(24) | Australia: NSW, Woodsreef<br>mine (NSW, WU: J.R.<br>Hosking 2773)               | MK027904 | MK027767 | Australia | perennial | 6 or more | tubular | polycolpate | dry | no |
| <i>A. conferta</i> Hook. f.<br>(25) | Australia: NSW, Southern<br>Tablelands (NSW, WU:<br>B.G. Briggs 9766, 9.2.2007) | MK027905 | MK027768 |           |           |           |         |             |     |    |
| <i>A. gunnii</i> Hook. f. (22)      | Australia: NSW, Barrington<br>Tops (NSW, WU: J.R.<br>Hosking 2818)              | MK027902 | MK027765 | Australia | perennial | 6 or more | tubular | polycolpate | dry | no |

|                                |                                                                                  |          |          |
|--------------------------------|----------------------------------------------------------------------------------|----------|----------|
| <i>A. gunnii</i> Hook. f. (23) | Australia: NSW, Barrington Tops (NSW, WU: J.R. Hosking 2820)                     | MK027903 | MK027766 |
| <i>A. gunnii</i> Hook. f. (26) | Australia: NSW, Southern Tablelands (NSW, WU: B.G. Briggs 9759, 8.2.2007)        | MK027906 | MK027769 |
| <i>A. gunnii</i> Hook. f. (27) | Australia: NSW, Southern Tablelands (NSW, WU: B.G. Briggs 9744, 4.2.2007)        | MK027907 | MK027770 |
| <i>A. gunnii</i> Hook. f. (32) | Australia: Tasmania, Cradle Valley (NSW 744764, WU: B.G. Briggs 9789, 24.2.2007) | MK027912 | MK027775 |

#### sect. *Glabella*

|                                      |                                                                                               |          |          |               |           |           |         |             |     |    |
|--------------------------------------|-----------------------------------------------------------------------------------------------|----------|----------|---------------|-----------|-----------|---------|-------------|-----|----|
| <i>A. laevigata</i> L.<br>(19M_GB25) | Italy: Elba Island (G: A. Natali & M.-A. Thiébaud s.n.)                                       | MK028057 | N/A      |               |           |           |         |             |     |    |
| <i>A. laevigata</i> L. (83)          | Tunisia: Ain Drahaen (WU: FE, 19.4.2001)                                                      | MK027951 | MK027814 | Mediterranean | perennial | 4         | tubular | polycolpate | dry | no |
| <i>A. libanotica</i> Boiss.<br>(42)  | Lebanon: Beit Meri (WU: FE, 22.3.2005)                                                        | MK027922 | MK027784 | Mediterranean | perennial | 4         | tubular | polycolpate | dry | no |
| <i>A. maximowiczii</i> Kom.<br>(136) | South Korea: near Seoul (CAS, GH: Boufford et al. 25791)                                      | MK027992 | MK027864 | E Eurasia     | perennial | 6 or more | tubular | polycolpate | dry | no |
| <i>A. tinctoria</i> L.<br>(01M_GB24) | Switzerland: Geneva, Bot. Garden (G: A. Natali & J.-F. Manen s.n., Geneva Bot. Garden 780680) | MK028013 | N/A      | Europe        | perennial | 6 or more | tubular | polycolpate | dry | no |

#### sect. *Hexaphylla*

|                                         |                                                                                                  |          |          |               |           |           |         |             |     |    |
|-----------------------------------------|--------------------------------------------------------------------------------------------------|----------|----------|---------------|-----------|-----------|---------|-------------|-----|----|
| <i>A. capitata</i> Kit. ex Schult. (51) | Romania: E Carpathians (WU: FE, 9.7.1998)                                                        | MK027931 | MK027790 | Europe        | perennial | 6 or more | tubular | polycolpate | dry | no |
| <i>A. hirsuta</i> Desf. (R273M)         | Spain (no herbarium voucher)                                                                     | MK028108 | N/A      | Mediterranean | perennial | 6 or more | tubular | polycolpate | dry | no |
| <i>A. hirta</i> Ramond (51M_GB20)       | Switzerland: Geneva, Bot. Garden (G: A. Natali & J.-F. Manen s.n., Geneva Bot. Garden 814140/0M) | MK028084 | N/A      | Europe        | perennial | 6 or more | tubular | polycolpate | dry | no |

|                                                 |                                                                        |          |          |                         |           |           |         |             |     |    |
|-------------------------------------------------|------------------------------------------------------------------------|----------|----------|-------------------------|-----------|-----------|---------|-------------|-----|----|
| <i>A. rupestris</i> Tineo (504M)                | Italy: Sicilia, Monte Cofano (PAL: L. Robba 12, Oct. 2003)             | MK028078 | N/A      | Mediterranean           | perennial | 6 or more | tubular | polycolpate | dry | no |
| <b>sect. <i>Thliphthisa</i></b>                 |                                                                        |          |          |                         |           |           |         |             |     |    |
| <i>A. breviflora</i> Boiss. (41)                | Lebanon: Bjarreh (WU: FE, 23.3.2005)                                   | MK027921 | MK027783 | Mediterranean           | perennial | 6 or more | tubular | polycolpate | dry | no |
| <i>A. chlorantha</i> Boiss. & Heldr. (69M_GB23) | Greece: Epirus (WU, G: FE 930413-4401)                                 | MK028092 | N/A      | Mediterranean           | perennial | 6 or more | rotate  | polycolpate | dry | no |
| <i>A. cypria</i> Ehrend. (133M)                 | Cyprus: Ayia-Anna (G: Iter Mediterranea IV 464)                        | MK028047 | N/A      | Mediterranean           | perennial | 6 or more | rotate  | polycolpate | dry | no |
| <i>A. purpurea</i> (L.) Ehrend. (77M_GB19)      | Italy: Alpi Apuane (G: A. Natali & J.-F. Manen 011)                    | MK028096 | N/A      | Mediterranean           | perennial | 6 or more | rotate  | polycolpate | dry | no |
| <b><i>Callipeltis</i></b>                       |                                                                        |          |          |                         |           |           |         |             |     |    |
| <i>C. aperta</i> Boiss. & Buhse (165M)          | Israel: northern Negev, Beer Sheva (G, GE: A. Danin et al. It. 15.042) | MK028053 | N/A      | SW Asia                 | annual    | 4         | rotate  | polycolpate | dry | no |
| <i>C. cucullaria</i> (L.) DC. (164M)            | Spain: Sierra de Gador (G: B. Valdes et al. It. 745/88)                | MK028052 | N/A      |                         |           |           |         |             |     |    |
| <i>C. cucullaria</i> (L.) DC. (61)              | Jordan: Aljun (WU: FE 1, 10.4.2000)                                    | N/A      | MK027797 | Mediterranean & SW Asia | annual    | 4         | rotate  | polycolpate | dry | no |
| <i>C. microstegia</i> Boiss. (17)               | Iran: Shiraz (WU: FE, 11.4.2006)                                       | MK027898 | N/A      | SW Asia                 | annual    | 4         | rotate  | polycolpate | dry | no |
| <b><i>Crucianella</i></b>                       |                                                                        |          |          |                         |           |           |         |             |     |    |
| <i>C. aegyptiaca</i> L. (131M)                  | Cyprus: Cape Kiti (G: Iter Mediterranea IV 299)                        | MK028045 | N/A      | Mediterranean           | annual    | 6 or more | tubular | polycolpate | dry | no |
| <i>C. angustifolia</i> L. (29M_GB28)            | France: Corsica, Francardo (G: D. Jeanmonod & A. Natali J5044)         | MK028068 | N/A      | Mediterranean           | annual    | 6 or more | tubular | polycolpate | dry | no |
| <i>C. gilanica</i> Trin. (285M)                 | Iran: Prov. East Azerbaijan, Amirabad (G, GE: K.H. Rechinger 43278)    | MK028066 | N/A      | SW Asia                 | perennial | 6 or more | tubular | polycolpate | dry | no |
| <i>C. imbricata</i> Boiss. (15)                 | Greece: Kalimnos (WU: Zervou 2524, 29.4.2002)                          | MK027896 | N/A      | Mediterranean           | annual    | 6 or more | tubular | polycolpate | dry | no |
| <i>C. latifolia</i> L. (16)                     | Greece: Kalimnos (WU: Zervou 966, 15.4.1999)                           | MK027897 | MK027761 | Mediterranean           | annual    | 6 or more | tubular | polycolpate | dry | no |

|                                       |                                                                       |          |          |               |           |           |         |             |     |    |
|---------------------------------------|-----------------------------------------------------------------------|----------|----------|---------------|-----------|-----------|---------|-------------|-----|----|
| <i>C. macrostachya</i> Boiss. (5)     | Lebanon: Byblos (WU: FE, 22.3.2005)                                   | MK027887 | MK027751 | Mediterranean | annual    | 6 or more | tubular | polycolpate | dry | no |
| <i>C. maritima</i> L. (123M)          | Italy: Sardinia, Platamona (G: A. Natali 56803)                       | MK028039 | N/A      |               |           |           |         |             |     |    |
| <i>C. maritima</i> L. (502M)          | Italy: Sicilia, Trapani, Capo Granitola (PAL: L. Robba 11, Oct. 2003) | MK028076 | N/A      | Mediterranean | perennial | 4         | tubular | polycolpate | dry | no |
| <i>C. patula</i> L. (283M)            | Spain: Salamanca, Las Calizas del Cabezal Vieijo (G, GE: E. Rico 53)  | MK028064 | N/A      | Mediterranean | annual    | 4         | tubular | polycolpate | dry | no |
| <i>C. rupestris</i> Guss. (501M)      | Italy: Sicilia, Trapani, Capo Granitola (PAL: L. Robba s.n.)          | MK028075 | N/A      | Mediterranean | perennial | 6 or more | tubular | polycolpate | dry | no |
| <i>C. suaveolens</i> C.A. Mey. (284M) | Iran: 40 km E Meshlirins hahz (G, GE: Herbiar Henri Pabot 3222)       | MK028065 | N/A      | SW Asia       | perennial | 4         | tubular | polycolpate | dry | no |

#### Cruciata

|                                                                                       |                                                                                  |          |          |                         |           |   |        |             |     |    |
|---------------------------------------------------------------------------------------|----------------------------------------------------------------------------------|----------|----------|-------------------------|-----------|---|--------|-------------|-----|----|
| <i>C. articulata</i> (L.) Ehrend. (50)                                                | Lebanon: Zahle (WU: FE, 26.3.2005)                                               | MK027930 | MK027789 | SW Asia                 | annual    | 4 | rotate | polycolpate | dry | no |
| <i>C. articulata</i> (L.) Ehrend. (63)                                                | Jordan: Aljun (WU: FE, 10.4.2000)                                                | MK027938 | MK027799 |                         |           |   |        |             |     |    |
| <i>C. laevipes</i> Opiz (34M_GB26)                                                    | France: Corsica, Radicale (G: D. Jeanmonod, A. Natali & R. Palese J4198)         | MK028072 | N/A      | Europe                  | perennial | 4 | rotate | polycolpate | dry | no |
| <i>C. pedemontana</i> (Bellardi) Ehrend. (125M)                                       | France: Corsica, Col de Vergio (G: G. Dutartre s.n.)                             | MK028041 | N/A      | Mediterranean & SW Asia | annual    | 4 | rotate | polycolpate | dry | no |
| <i>C. taurica</i> (Pall. ex Willd.) Ehrend. (282M)                                    | Turkey: Kütahya - Gediz (G, GE: M. Nydegger 40743)                               | MK028063 | N/A      | SW Asia                 | perennial | 4 | rotate | polycolpate | dry | no |
| <i>C. verna</i> (Scop.) Gutermann & Ehrend. (= <i>C. glabra</i> (L.) Opiz) (22M_GB27) | Italy: Elba Island (G: A. Natali & M.-A. Thiébaud N57761 [as "Cruciata glabra"]) | MK028059 | N/A      | Europe                  | perennial | 4 | rotate | polycolpate | dry | no |

#### Didymaea

|                                                            |                                                                                                                        |          |          |                         |           |                      |        |             |        |     |
|------------------------------------------------------------|------------------------------------------------------------------------------------------------------------------------|----------|----------|-------------------------|-----------|----------------------|--------|-------------|--------|-----|
| <i>D. alsinoides</i> (Schltdl. & Cham.) Standl. (71M_GB37) | Costa Rica (WU: M. Kiehn s.n.)                                                                                         | MK028093 | N/A      | Central America         | perennial | 2 + 2 small stipules | rotate | polycolpate | fleshy | no  |
| <b><i>Galium</i></b>                                       |                                                                                                                        |          |          |                         |           |                      |        |             |        |     |
| <b>sect. <i>Aparine</i></b>                                |                                                                                                                        |          |          |                         |           |                      |        |             |        |     |
| <i>G. aparine</i> L. (15M_GB13)                            | France: Corsica, Pietrabugno (G: D. Jeanmonod & A. Natali s.n.)                                                        | MK028051 | N/A      | Europe & SW Asia        | annual    | 6 or more            | rotate | polycolpate | dry    | yes |
| <i>G. monachinii</i> Boiss. & Heldr. (9)                   | Greece: Kalimnos (WU: Zervou 2614, 28.4.2007)                                                                          | MK027891 | MK027755 | Mediterranean           | annual    | 6 or more            | rotate | polycolpate | dry    | yes |
| <i>G. pisiferum</i> Boiss. (44)                            | Lebanon: Saida, Eschmun Tempel (WU: FE, 21.3.2006)                                                                     | MK027924 | N/A      |                         |           |                      |        |             |        |     |
| <i>G. pisiferum</i> Boiss. (45)                            | Lebanon: Qana (WU: FE, 21.3.2005)                                                                                      | MK027925 | MK027786 | Mediterranean           | annual    | 6 or more            | rotate | polycolpate | dry    | no  |
| <i>G. pisiferum</i> Boiss. (46)                            | Lebanon: Nahr el Kalb (WU: FE, 22.3.2005)                                                                              | MK027926 | N/A      |                         |           |                      |        |             |        |     |
| <i>G. spurium</i> L. (110M)                                | China: Zhejiang (G: C.T. Chen 9403001)                                                                                 | MK028030 | N/A      | Mediterranean & SW Asia | annual    | 6 or more            | rotate | polycolpate | dry    | yes |
| <i>G. spurium</i> L. (31)                                  | Australia (unknown: J.R. Hosking 2776)                                                                                 | MK027911 | MK027774 | Mediterranean & SW Asia | annual    | 6 or more            | rotate | polycolpate | dry    | yes |
| <b>sect. <i>Aparinoides</i></b>                            |                                                                                                                        |          |          |                         |           |                      |        |             |        |     |
| <i>G. debile</i> Desv. (130)                               | Australia: New South Wales, Moss Vale (NSW 495299: Kodel & Sainty 260 [as “ <i>Galium palustre</i> ”: Thompson, 2009]) | MK027988 | MK027859 | Mediterranean           | perennial | 6 or more            | rotate | polycolpate | dry    | no  |
| <i>G. elongatum</i> C. Presl (06M_GB15)                    | France: Corsica, St. Florent (G: D. Jeanmonod & A. Natali J4966)                                                       | MK028018 | N/A      | Europe                  | perennial | 6 or more            | rotate | polycolpate | dry    | no  |
| <i>G. innocuum</i> Miq. (131)                              | China: Yunnan, Tengchong (WU, CAS: Gaoligong Shan 29775)                                                               | MK027989 | MK027860 | E Eurasia               | perennial | 6 or more            | rotate | polycolpate | dry    | no  |
| <i>G. magellanicum</i> Hook. f. (78)                       | Chile: Torres del Paine (WU: FE 75, 4.2.1998)                                                                          | MK027948 | MK027810 | South America           | perennial | 6 or more            | rotate | polycolpate | dry    | no  |
| <i>G. magellense</i> Ten. (134)                            | Italy: Gran Sasso (WU: seed exchange)                                                                                  | N/A      | MK027862 | Mediterranean           | perennial | 6 or more            | rotate | polycolpate | dry    | no  |

|                                                     |                                                                            |          |          |               |           |                               |        |             |     |     |
|-----------------------------------------------------|----------------------------------------------------------------------------|----------|----------|---------------|-----------|-------------------------------|--------|-------------|-----|-----|
| <i>G. palustre</i> L.<br>(14M_GB14)                 | Switzerland: Geneva (G: A. Natali & J.-F. Manen s.n.)                      | MK028050 | N/A      | Europe        | perennial | 6 or more                     | rotate | polycolpate | dry | no  |
| <b>sect. <i>Aspera</i></b>                          |                                                                            |          |          |               |           |                               |        |             |     |     |
| <i>G. capitatum</i> Bory & Chaub. (11)              | Greece: Kalimnos (WU: Zervou 2624, 29.4.2007)                              | MK027893 | MK027757 | Mediterranean | annual    | 6 or more                     | rotate | polycolpate | dry | no  |
| <i>G. capitatum</i> Bory & Chaub. (12)              | Greece: Kalimnos (WU: Zervou 2463, 6.4.2003)                               | MK027894 | MK027758 |               |           |                               |        |             |     |     |
| <i>G. divaricatum</i> Lam.<br>(04M_GB17)            | France: Corsica, Ajaccio (G: D. Jeanmonod, A. Natali & C. Zellweger J3394) | MK028016 | N/A      | Mediterranean | annual    | 6 or more                     | rotate | polycolpate | dry | no  |
| <i>G. intricatum</i> Margot & Reut. (55M_GB8)       | Greece: Ionian Islands (WU, G: FE 930409-2501)                             | MK028088 | N/A      | Mediterranean | annual    | 6 or more                     | rotate | polycolpate | dry | yes |
| <i>G. minutulum</i> Jord.<br>(129M)                 | France: Corsica, Punta Cavallata (G: G. Dutartre, 28.4.1983)               | MK028042 | N/A      | Mediterranean | annual    | 6 or more                     | rotate | polycolpate | dry | yes |
| <i>G. murale</i> (L.) All.<br>(13)                  | Greece: Kalimnos (WU: Zervou 631, 11.4.1999)                               | MK027895 | MK027759 | Mediterranean | annual    | 6 or more                     | rotate | polycolpate | dry | yes |
| <i>G. murale</i> (L.) All.<br>(14)                  | Greece: Telendos (WU: Zervou 943, 21.2.1999)                               | N/A      | MK027760 |               |           |                               |        |             |     |     |
| <i>G. murale</i> (L.) All.<br>(54M_GB7)             | Greece: Ionian Islands (WU, G: FE 930409-2502)                             | MK028087 | N/A      |               |           |                               |        |             |     |     |
| <i>G. parisiense</i> L.<br>(10M_GB18)               | France: Corsica, Radicale (G: D. Jeanmonod, A. Natali & R. Palese J4186)   | MK028029 | N/A      | Mediterranean | annual    | 6 or more                     | rotate | polycolpate | dry | no  |
| <i>G. verticillatum</i> Danthoine ex Lam.<br>(505M) | Italy: Sicilia, Madonie (PAL, GE: L. Robba 5, Oct. 2003)                   | MK028079 | N/A      | Mediterranean | annual    | 6 or more                     | rotate | polycolpate | dry | no  |
| <b>sect. <i>Cymogalia</i></b>                       |                                                                            |          |          |               |           |                               |        |             |     |     |
| <i>G. paradoxum</i> Maxim.<br>(139)                 | China: Henan, Neixiang Xian (CAS, GH: Boufford et al. 26275)               | MK027995 | MK027867 | E Eurasia     | perennial | 2 + 2<br>enlarged<br>stipules | rotate | polycolpate | dry | yes |
| <i>G. paradoxum</i> Maxim.<br>(140)                 | China: Sichuan, Danba Xian (WU, GH: Boufford et al. 38045)                 | MK027996 | MK027868 | E Eurasia     | perennial | 2 + 2<br>enlarged<br>stipules | rotate | polycolpate | dry | yes |
| <b>sect. <i>Depauperata</i></b>                     |                                                                            |          |          |               |           |                               |        |             |     |     |

|                                                |                                                                              |          |          |                  |           |                               |         |             |     |     |
|------------------------------------------------|------------------------------------------------------------------------------|----------|----------|------------------|-----------|-------------------------------|---------|-------------|-----|-----|
| <i>G. exile</i> Hook. f. (120)                 | China: Sichuan, Rangtang Xian (WU, GH: Boufford et al. 39294)                | MK027978 | MK027849 | E Eurasia        | annual    | 2 + 2<br>enlarged<br>stipules | rotate  | polycolpate | dry | yes |
| <i>G. exile</i> Hook. f. (154)                 | China: Qinghai, Nangqen Xian (CAS: Ho et al. 2532)                           | N/A      | MK027879 |                  |           |                               |         |             |     |     |
| <b>sect. <i>Galium</i></b>                     |                                                                              |          |          |                  |           |                               |         |             |     |     |
| <i>G. aetnium</i> Biv. (21M)                   | Italy: Sardegna, Capraia Island (G: A. Natali & M.-A. Thiébaud N57944)       | MK028058 | N/A      | Mediterranean    | perennial | 6 or more                     | rotate  | polycolpate | dry | no  |
| <i>G. album</i> Mill. (03M_GB2)                | France: Corsica, Solenzara (G: D. Jeanmonod, A. Natali & R. Palese s.n.)     | MK028015 | N/A      |                  |           |                               |         |             |     |     |
| <i>G. album</i> Mill. (107)                    | Bulgaria: Lozenska Mt., 650 m (WU: M. Anchev A00683)                         | MK027967 | MK027838 | Europe           | perennial | 6 or more                     | rotate  | polycolpate | dry | no  |
| <i>G. album</i> Mill. (26M)                    | France: Corsica, St. Florent (G: D. Jeanmonod & A. Natali J4963)             | MK028062 | N/A      |                  |           |                               |         |             |     |     |
| <i>G. arenarium</i> Loisel. (93M)              | France: Aude, Montdieu (WU: FE 2038)                                         | MK028105 | N/A      | Mediterranean    | perennial | 6 or more                     | rotate  | polycolpate | dry | no  |
| <i>G. asparagifolium</i> Boiss. & Heldr. (97M) | Greece: Mt. Parnassos (WU: FE 1966)                                          | MK028107 | N/A      | Mediterranean    | perennial | 6 or more                     | rotate  | polycolpate | dry | no  |
| <i>G. capense</i> Thunb. (70)                  | South Africa: Zederberg (WU: FE 84b, 11.12.1999)                             | MK027944 | N/A      |                  |           |                               |         |             |     |     |
| <i>G. capense</i> Thunb. (71)                  | South Africa: Ceres-Zederberg (WU: FE 82, 11.12.1999)                        | MK027945 | MK027804 | Africa           | perennial | 6 or more                     | rotate  | polycolpate | dry | no  |
| <i>G. corrudifolium</i> Vill. (31M)            | Italy: Elba Island (G: A. Natali & M.-A. Thiébaud N56941)                    | MK028069 | N/A      | Mediterranean    | perennial | 6 or more                     | rotate  | polycolpate | dry | no  |
| <i>G. glaucum</i> L. (507M)                    | Central Europe (no herbarium voucher)                                        | MK028081 | N/A      | Europe           | perennial | 6 or more                     | tubular | polycolpate | dry | no  |
| <i>G. humifusum</i> M. Bieb. (60)              | Jordan: Petra (WU: FE, 7.4.2000 [as “ <i>Galium</i> cf. <i>humifusum</i> ”]) | MK027936 | MK027796 | Europe & SW Asia | perennial | 6 or more                     | rotate  | polycolpate | dry | no  |



|                                      |                                                                           |          |          |               |           |           |        |             |     |    |
|--------------------------------------|---------------------------------------------------------------------------|----------|----------|---------------|-----------|-----------|--------|-------------|-----|----|
| <i>G. laevigatum</i> L. (101)        | Italy: Alpi Bergamasche, Passo S. Marco Bema-Schlucht (WU: FE, 16.8.2000) | MK027962 | MK027832 | Europe        | perennial | 6 or more | rotate | polycolpate | dry | no |
| <i>G. libanoticum</i> Ehrend. (47)   | Lebanon: Bjarreh (WU: FE)                                                 | MK027927 | MK027787 | Mediterranean | perennial | 6 or more | rotate | polycolpate | dry | no |
| <i>G. lovcense</i> Urum. (109)       | Bulgaria: Pirin Mt., 1660 m (WU: M. Anchev A00747-2)                      | MK027968 | MK027839 | Mediterranean | perennial | 6 or more | rotate | polycolpate | dry | no |
| <i>G. lucidum</i> All. (08M)         | France: Corsica, Strette (G: D. Jeanmonod & A. Natali J4964)              | MK028020 | N/A      | Europe        | perennial | 6 or more | rotate | polycolpate | dry | no |
| <i>G. lucidum</i> All. (18M_GB1_201) | Italy: Elba Island (G: A. Natali & M.-A. Thiébaud N56959)                 | MK028056 | N/A      |               |           |           |        |             |     |    |
| <i>G. lucidum</i> All. (2)           | Bulgaria: loc. 07-78 (WU: V. Vladimirov)                                  | MK027884 | MK027748 | Europe        | perennial | 6 or more | rotate | polycolpate | dry | no |
| <i>G. lucidum</i> All. (57M)         | Greece: Ionian Islands (WU: FE 930409-2503)                               | MK028090 | N/A      |               |           |           |        |             |     |    |
| <i>G. maritimum</i> L. (94M)         | France: Morbihan (WU: FE 2051)                                            | MK028106 | N/A      | Mediterranean | perennial | 6 or more | rotate | polycolpate | dry | no |
| <i>G. mirum</i> Rech. f. (122M)      | Bulgaria: Besaparski (G: Anchev & Mincho A9234)                           | MK028038 | N/A      | Mediterranean | perennial | 6 or more | rotate | polycolpate | dry | no |
| <i>G. mollugo</i> L. (12M_122M)      | France: Corsica, Calvi (G: D. Jeanmonod, A. Natali & C. Zellweger s.n.)   | MK028043 | N/A      | Europe        | perennial | 6 or more | rotate | polycolpate | dry | no |
| <i>G. perralderi</i> Coss. (81)      | Tunisia: Sidi Saad, Stausee (WU: FE, 23.4.2001 [as “Galium perrieri”])    | MK027949 | MK027812 | Mediterranean | perennial | 6 or more | rotate | polycolpate | dry | no |
| <i>G. poiretianum</i> Ball (82)      | Tunisia: Cap Bon (WU: FE, 16.4.2001)                                      | MK027950 | MK027813 | Mediterranean | perennial | 6 or more | rotate | polycolpate | dry | no |
| <i>G. rhodopeum</i> Velen. (106)     | Bulgaria: Bessaparski hills (WU: M. Anchev A00715)                        | MK027966 | MK027837 | Mediterranean | perennial | 6 or more | rotate | polycolpate | dry | no |
| <i>G. rhodopeum</i> Velen. (121M)    | Bulgaria: Besaparski (G: Anchev & Mincho A9232)                           | MK028037 | N/A      |               |           |           |        |             |     |    |

|                                                |                                                                      |          |          |                       |           |           |        |             |     |    |
|------------------------------------------------|----------------------------------------------------------------------|----------|----------|-----------------------|-----------|-----------|--------|-------------|-----|----|
| <i>G. sylvaticum</i> L.<br>(83M)               | Switzerland: Geneva,<br>Versoix (G: A. Natali & J.-<br>F. Manen 018) | MK028102 | N/A      | Europe                | perennial | 6 or more | rotate | polycolpate | dry | no |
| <i>G. thymifolium</i> Boiss.<br>& Heldr. (92M) | Greece: Mt. Parnasse (WU:<br>FE 1989)                                | MK028104 | N/A      | Mediterranean         | perennial | 6 or more | rotate | polycolpate | dry | no |
| <i>G. tunetanum</i> Lam.<br>(508M)             | Italy: Sicilia, Mazzara<br>(PAL, GE: L. Robba 4)                     | MK028082 | N/A      | Mediterranean         | perennial | 6 or more | rotate | polycolpate | dry | no |
| <i>G. verum</i> L. (1)                         | Bulgaria: loc. 07-70 G-2<br>(WU: V. Vladimirov)                      | MK027883 | MK027747 | Europe & E<br>Eurasia | perennial | 6 or more | rotate | polycolpate | dry | no |
| <i>G. verum</i> L. (23M)                       | Switzerland: Geneva,<br>Lullier (G: A. Natali & J.-F.<br>Manen 009)  | MK028060 | N/A      |                       |           |           |        |             |     |    |

#### sect. *Hylaea*

|                                                                                      |                                                                                      |          |          |           |           |           |        |             |     |     |
|--------------------------------------------------------------------------------------|--------------------------------------------------------------------------------------|----------|----------|-----------|-----------|-----------|--------|-------------|-----|-----|
| <i>G. echinocarpum</i><br>Hayata (152)                                               | Taiwan: Chiayi Co., 3400-<br>3700m (PE: Yu-pin Cheng<br>2391)                        | MK028007 | MK027877 | E Eurasia | perennial | 6 or more | rotate | polycolpate | dry | yes |
| <i>G. hoffmeisteri</i><br>(Klotzsch) Ehrend. &<br>Schönb.-Tem. ex R.R.<br>Mill (116) | China: Yunnan, Lushui<br>Xian (CAS: Gaoligong Shan<br>10216 [as “Galium<br>bungei”]) | MK027974 | MK027845 |           |           |           |        |             |     |     |
| <i>G. hoffmeisteri</i><br>(Klotzsch) Ehrend. &<br>Schönb.-Tem. ex R.R.<br>Mill (124) | China: Yunnan (WU, GH:<br>Gaoligong Shan 23338)                                      | MK027982 | MK027853 |           |           |           |        |             |     |     |
| <i>G. hoffmeisteri</i><br>(Klotzsch) Ehrend. &<br>Schönb.-Tem. ex R.R.<br>Mill (125) | China: Yunnan (WU, GH:<br>Gaoligong Shan 24112)                                      | MK027983 | MK027854 | E Eurasia | perennial | 6 or more | rotate | polycolpate | dry | yes |
| <i>G. hoffmeisteri</i><br>(Klotzsch) Ehrend. &<br>Schönb.-Tem. ex R.R.<br>Mill (126) | China: Yunnan (WU, GH:<br>Gaoligong Shan 29310)                                      | MK027984 | MK027855 |           |           |           |        |             |     |     |
| <i>G. hoffmeisteri</i><br>(Klotzsch) Ehrend. &<br>Schönb.-Tem. ex R.R.<br>Mill (127) | China: Yunnan (WU, GH:<br>Gaoligong Shan 34430)                                      | MK027985 | MK027856 |           |           |           |        |             |     |     |

|                                                                                      |                                                                                                                   |          |          |                       |           |           |         |             |     |     |  |
|--------------------------------------------------------------------------------------|-------------------------------------------------------------------------------------------------------------------|----------|----------|-----------------------|-----------|-----------|---------|-------------|-----|-----|--|
| <i>G. hoffmeisteri</i><br>(Klotzsch) Ehrend. &<br>Schönb.-Tem. ex R.R.<br>Mill (128) | China: Gansu, Wen Xian<br>(WU, CAS, GH: Boufford<br>et al. 37617)                                                 | MK027986 | MK027857 |                       |           |           |         |             |     |     |  |
| <i>G. hoffmeisteri</i><br>(Klotzsch) Ehrend. &<br>Schönb.-Tem. ex R.R.<br>Mill (129) | China: Sichuan, Baiyu Xian<br>(WU, GH: Boufford et al.<br>37059)                                                  | MK027987 | MK027858 | E Eurasia             | perennial | 6 or more | rotate  | polycolpate | dry | yes |  |
| <i>G. japonicum</i> Makino<br>( <i>G. nipponicum</i><br>Makino) (159)                | Japan: Hokkaido, Furano<br>(WU: Sohma & Takahashi<br>708 [as “Galium<br>nipponicum”])                             | MK028009 | N/A      | E Eurasia             | perennial | 6 or more | rotate  | polycolpate | dry | yes |  |
| <i>G. japonicum</i> Makino<br>( <i>G. nipponicum</i><br>Makino) (160)                | Japan: Honshu, Yamanashi<br>Pref. (WU: Flora Jap.<br>Exsiccata 516 [as “Galium<br>triflorum var.<br>nipponicum”]) | MK028010 | MK027880 | E Eurasia             | perennial | 6 or more | rotate  | polycolpate | dry | yes |  |
| <i>G. odoratum</i> (L.)<br>Scop. (80M_GB6)                                           | Switzerland: Geneva,<br>Versoix (G: A. Natali & J.-<br>F. Manen 016)                                              | MK028099 | N/A      | Europe & E<br>Eurasia | perennial | 6 or more | tubular | polycolpate | dry | yes |  |
| <i>G. odoratum</i> (L.)<br>Scop. (86)                                                | Korea: Villung Island (WU:<br>Tod Stuessy [as “Asperula<br>odorata”])                                             | MK027953 | MK027817 | Europe & E<br>Eurasia | perennial | 6 or more | tubular | polycolpate | dry | yes |  |

**sect. *Jubogalium***

|                                                                 |                                               |          |          |               |           |           |        |             |     |    |  |
|-----------------------------------------------------------------|-----------------------------------------------|----------|----------|---------------|-----------|-----------|--------|-------------|-----|----|--|
| <i>G. canum</i> Req. ex DC. (49)                                | Cyprus: Kyrenia (WU: FE, Feb. 2005)           | MK027929 | MK027788 |               |           |           |        |             |     |    |  |
| <i>G. canum</i> Req. ex DC. (8)                                 | Greece: Kalimnos (WU: Zervou 2624, 29.4.2007) | MK027890 | MK027754 | Mediterranean | perennial | 6 or more | rotate | polycolpate | dry | no |  |
| <i>G. graecum</i> L. (6)                                        | Greece: Kalimnos (WU: Zervou 1887, 8.4.2000)  | MK027888 | MK027752 | Mediterranean | perennial | 6 or more | rotate | polycolpate | dry | no |  |
| <i>G. graecum</i> L. (7)                                        | Greece: Kalimnos (WU: Zervou 2587, 27.4.2006) | MK027889 | MK027753 |               |           |           |        |             |     |    |  |
| <i>G. judaicum</i> Boiss. (57)                                  | Jordan: Gerasa (WU: FE A2, 10.4.2000)         | MK027935 | N/A      | Mediterranean | annual    | 6 or more | rotate | polycolpate | dry | no |  |
| <i>G. jungermannioides</i> Boiss. (43)                          | Lebanon: Balamand (WU: FE 24.3.2005)          | MK027923 | MK027785 | Mediterranean | perennial | 6 or more | rotate | polycolpate | dry | no |  |
| <i>G. petrae</i> Oliv. ex Hart (59)                             | Jordan: Petra (WU: FE, 17.4.2000)             | N/A      | MK027795 | Mediterranean | perennial | 6 or more | rotate | polycolpate | dry | no |  |
| <i>G. setaceum</i> subsp. <i>decaisnei</i> (Boiss.) Ehrend. (3) | Iran: Shiraz (WU: FE, 11.4.2006)              | MK027885 | MK027749 | Mediterranean | annual    | 6 or more | rotate | polycolpate | dry | no |  |

**sect. *Kolgyda***

|                                       |                                                                                        |          |          |               |        |           |        |             |     |    |
|---------------------------------------|----------------------------------------------------------------------------------------|----------|----------|---------------|--------|-----------|--------|-------------|-----|----|
| <i>G. ceratopodium</i> Boiss. (19)    | Iran: Pasagarde (WU: FE, 13.4.2006)                                                    | MK027899 | MK027762 | SW Asia       | annual | 6 or more | rotate | polycolpate | dry | no |
| <i>G. tricornutum</i> Dandy (10)      | Greece: Kalimnos (WU: Zervou 2679, 12.4.2007)                                          | MK027892 | MK027756 | Mediterranean | annual | 6 or more | rotate | polycolpate | dry | no |
| <i>G. tricornutum</i> Dandy (76M)     | Switzerland: Geneva, Bot. Garden (G: A. Natali & J.-F. Manen 014 - Geneva Bot. Garden) | MK028095 | N/A      |               |        |           |        |             |     |    |
| <i>G. verrucosum</i> Huds. (24M_GB11) | France: Corsica, Bonifacio (G: D. Jeanmonod, A. Natali & D. Roguet J3980)              | MK028061 | N/A      |               |        |           |        |             |     |    |
| <i>G. verrucosum</i> Huds. (4)        | Cyprus: Paphos (WU: FE, Feb. 2005)                                                     | MK027886 | MK027750 | Mediterranean | annual | 6 or more | rotate | polycolpate | dry | no |
| <i>G. verrucosum</i> Huds. (48)       | Cyprus: Kowrion (WU: FE, Feb. 2005)                                                    | MK027928 | N/A      |               |        |           |        |             |     |    |
| <i>G. verrucosum</i> Huds. (56M)      | Greece: Ionian Islands (WU: FE 930409-25)                                              | MK028089 | N/A      |               |        |           |        |             |     |    |

**sect. *Leptogalium***

|                                       |                                                                                                 |          |          |               |           |           |        |             |     |    |
|---------------------------------------|-------------------------------------------------------------------------------------------------|----------|----------|---------------|-----------|-----------|--------|-------------|-----|----|
| <i>G. × centroniae</i> Cariot (94)    | Italy: Alpi Bergamasche – S. Marco Pan ob Alboredo, ca. 1000 m (WU: FE, 16.8.2000)              | N/A      | MK027825 | Europe        | perennial | 6 or more | rotate | polycolpate | dry | no |
| <i>G. anisophyllum</i> Vill. (100)    | Switzerland: Splügen (WU: FE, 12.8.2000)                                                        | N/A      | MK027831 |               |           |           |        |             |     |    |
| <i>G. anisophyllum</i> Vill. (103)    | Italy: eastern Alpi Bergamasche: - Mt. Cocco, ca. 2400 m (WU: P. Schönschwetter, 16.8.2000)     | N/A      | MK027834 |               |           |           |        |             |     |    |
| <i>G. anisophyllum</i> Vill. (58)     | Switzerland: Pilatus (WU: FE, 3.6.2001)                                                         | N/A      | MK027794 |               |           |           |        |             |     |    |
| <i>G. anisophyllum</i> Vill. (85)     | Austria: Niederösterreich, Rax, Bergstation Seilbahn – Ottohaus, ca. 1600 m (WU: FE, 30.6.2002) | N/A      | MK027816 | Europe        | perennial | 6 or more | rotate | polycolpate | dry | no |
| <i>G. anisophyllum</i> Vill. (87)     | Romania, Carpathians, Hagimas (WU: FE, July 1998)                                               | N/A      | MK027818 |               |           |           |        |             |     |    |
| <i>G. anisophyllum</i> Vill. (97)     | Italy: Alpi Bergamasche, Passo di S.Marco ob Morbegno, c.2000 m (WU: FE, 15.8.2000)             | N/A      | MK027828 |               |           |           |        |             |     |    |
| <i>G. anisophyllum</i> Vill. (98)     | Austria: Kärnten, Hoch-Obir, 2100 m (WU: FE, 21.7.1998)                                         | N/A      | MK027829 |               |           |           |        |             |     |    |
| <i>G. corsicum</i> Spreng. (09M_GB16) | France: Corsica, Col St. Jean (G: D. Jeanmonod & A. Natali J4931)                               | MK028021 | N/A      | Mediterranean | perennial | 6 or more | rotate | polycolpate | dry | no |
| <i>G. noricum</i> Ehrend. (77)        | Austria: Kärnten, Hochobir, ca. 2100 m (WU: FE, 21.7.1998)                                      | N/A      | MK027809 | Europe        | perennial | 6 or more | rotate | polycolpate | dry | no |
| <i>G. noricum</i> Ehrend. (79)        | Austria: Kärnten, Petzen, ca. 1950 m (WU: FE, 23.7.2001)                                        | N/A      | MK027811 |               |           |           |        |             |     |    |
| <i>G. valentinum</i> Lange (89)       | Spain: Valencia (WU: M. Boşcaiu)                                                                | N/A      | MK027820 | Mediterranean | perennial | 6 or more | rotate | polycolpate | dry | no |



| sect. <i>Platygalium</i>                                              |                                                                                                 |          |          |                    |           |   |        |             |        |     |  |
|-----------------------------------------------------------------------|-------------------------------------------------------------------------------------------------|----------|----------|--------------------|-----------|---|--------|-------------|--------|-----|--|
| <i>G. araucanum</i> Phil. (76)                                        | Chile: Pucón (WU: P. Menzel & M.Kiehn 971105-4/1)                                               | MK027947 | MK027808 | South America      | perennial | 4 | rotate | polycolpate | dry    | no  |  |
| <i>G. araucanum</i> Phil. (92)                                        | Chile: Nahuelbuta (WU: FE, Jan.1998)                                                            | MK027957 | MK027823 |                    |           |   |        |             |        |     |  |
| <i>G. baillonii</i> Brandza (52M_GB10)                                | Romania: Prov. Arges (WU, G: FE 890821-3001)                                                    | MK028085 | N/A      | Europe             | perennial | 4 | rotate | polycolpate | dry    | no  |  |
| <i>G. bermudense</i> L. (287M)                                        | USA: Georgia, Sapelo Island (G, GE: W.H. Duncan 20648)                                          | MK028067 | N/A      | North America      | perennial | 4 | rotate | polycolpate | fleshy | no  |  |
| <i>G. bigeminum</i> Griseb. (62)                                      | Argentina: Cordoba (WU: FE 108, 18.2.1998)                                                      | MK027937 | MK027798 | South America      | perennial | 4 | rotate | polycolpate | fleshy | no  |  |
| <i>G. boreale</i> L. (79M_GB9_209)                                    | Switzerland: Geneva, Bot. Garden (G: A. Natali & J.-F. Manen s.n., Geneva Bot. Garden 814159/0) | MK028098 | N/A      |                    |           |   |        |             |        |     |  |
| <i>G. boreale</i> L. (R286M)                                          | Kashmir, Chhachos Pass (G: L.G. Webster & E. Nasir 6405)                                        | MK028113 | N/A      | Europe & E Eurasia | perennial | 4 | rotate | polycolpate | dry    | no  |  |
| <i>G. bungei</i> Steud. (102M)                                        | Japan: Nikko (WU, G: FE & HB 930825-0101)                                                       | MK028024 | N/A      |                    |           |   |        |             |        |     |  |
| <i>G. bungei</i> Steud. (123)                                         | China: Sichuan, Dujiangyan Xian (CAS, GH: Bouford et al. 24129 [as “Galium aff. paradoxum”])    | MK027981 | MK027852 |                    |           |   |        |             |        |     |  |
| <i>G. bungei</i> Steud. (34)                                          | China: Beijing, Great Wall (WU: FE, 14.8.2006)                                                  | MK027914 | MK027777 | E Eurasia          | perennial | 4 | rotate | polycolpate | dry    | yes |  |
| <i>G. bungei</i> Steud./ <i>G. yunnanense</i> H. Hara & C.Y. Wu (148) | China: Yunnan (CAS, WU: Gaoligong Shan 17673)                                                   | MK028004 | MK027875 | E Eurasia          | perennial | 4 | rotate | polycolpate | dry    | yes |  |
| <i>G. californicum</i> Hook. & Arn. (111M)                            | USA: California, Orinda (G: Dempster s.n.)                                                      | MK028031 | N/A      | North America      | perennial | 4 | rotate | polycolpate | dry    | no  |  |
| <i>G. californicum</i> Hook. & Arn. (66)                              | USA: California, Monterey (WU: FE 31, 25.7.1999)                                                | MK027940 | N/A      |                    |           |   |        |             |        |     |  |

|                                         |                                                                                                                  |          |          |               |           |   |        |             |     |     |
|-----------------------------------------|------------------------------------------------------------------------------------------------------------------|----------|----------|---------------|-----------|---|--------|-------------|-----|-----|
| <i>G. ciliare</i> Hook. f. (29)         | Australia: Tasmania, Cradle Valley (NSW 744321: B.G. Briggs 9783, 23.2.2007)                                     | MK027909 | MK027772 | Australia     | perennial | 4 | rotate | polycolpate | dry | no  |
| <i>G. ciliare</i> Hook. f. (30)         | Australia: NSW, Southern Tablelands, Kosciusko (NSW 744306: B.G. Briggs 9769, 9.2.2007 [as “ <i>Asperula</i> ”]) | MK027910 | MK027773 |               |           |   |        |             |     |     |
| <i>G. circaeazans</i> Michx. (20)       | USA: West Virginia, Shenandoah Mts. (WU: FE, 8.5.2007)                                                           | MK027900 | MK027763 | North America | perennial | 4 | rotate | polycolpate | dry | yes |
| <i>G. elegans</i> Wall. (104)           | China: Yunnan (a) (WU: Schneeweiss)                                                                              | MK027964 | MK027835 |               |           |   |        |             |     |     |
| <i>G. elegans</i> Wall. (105)           | China: Yunnan (b) (WU: Schneeweiss)                                                                              | MK027965 | MK027836 | E Eurasia     | perennial | 4 | rotate | polycolpate | dry | yes |
| <i>G. elegans</i> Wall. (135)           | China: Yunnan, Longling Xian (CAS: Gaoligong Shan 23691)                                                         | MK027991 | MK027863 |               |           |   |        |             |     |     |
| <i>G. elegans</i> Wall. (153)           | China: Yunnan, Fugong Xian (WU, CAS: Gaoligong Shan 28433)                                                       | MK028008 | MK027878 |               |           |   |        |             |     |     |
| <i>G. elegans</i> Wall. (38)            | China: Kunming (WU: FE, 27.7.2006)                                                                               | MK027918 | MK027780 | E Eurasia     | perennial | 4 | rotate | polycolpate | dry | yes |
| <i>G. eriocarpum</i> Bartl. ex DC. (74) | Chile: Santiago: Andes (WU: FE 3, 17.1.1998 [as “ <i>Galium eriophorum</i> ”])                                   | N/A      | MK027807 | South America | perennial | 4 | rotate | polycolpate | dry | no  |
| <i>G. gaudichaudii</i> DC. (28)         | Australia: NSW, Blackfellows Knob (NSW, WU: J.R. Hosking 2778)                                                   | MK027908 | MK027771 | Australia     | perennial | 4 | rotate | polycolpate | dry | no  |
| <i>G. glandulosum</i> Hand.-Mazz. (122) | China: Sichuan, Yajiang Xian (WU, GH: Boufford et al. 35962)                                                     | MK027980 | MK027851 |               |           |   |        |             |     |     |
| <i>G. glandulosum</i> Hand.-Mazz. (121) | China: Sichuan, Derong Xian (WU, GH: Boufford et al. 30811)                                                      | MK027979 | MK027850 | E Eurasia     | perennial | 4 | rotate | polycolpate | dry | yes |
| <i>G. grande</i> McClatchie (112M)      | USA: California, Chantry Flat (G: Dempster & Stebbins 3975)                                                      | MK028032 | N/A      | North America | perennial | 4 | rotate | polycolpate | dry | no  |



|                                                                      |                                                                                       |          |          |               |           |   |        |             |        |     |
|----------------------------------------------------------------------|---------------------------------------------------------------------------------------|----------|----------|---------------|-----------|---|--------|-------------|--------|-----|
| <i>G. hirtum</i> Lam. (56)                                           | Brazil: Porto Alegre (WU: FE B1, 6.3.1998)                                            | MK027934 | MK027793 | South America | perennial | 4 | rotate | polycolpate | fleshy | no  |
| <i>G. humile</i> Cham. & Schldl. (55)                                | Brazil: Haimbezinho (WU: FE B2, 7.3.1998 [as “ <i>Relbunium humile</i> ”])            | N/A      | MK027792 | South America | annual    | 4 | rotate | polycolpate | dry    | no  |
| <i>G. hypocarpium</i> (L.) Endl. ex Griseb. (113M)                   | Costa Rica (WU: Vienna Bot. Garden HBV RR 92/2)                                       | MK028033 | N/A      | South America | perennial | 4 | rotate | polycolpate | fleshy | no  |
| <i>G. kamtschaticum</i> Steller ex Schult. & Schult. f. (101M)       | Japan: Nikko Nat. Park (WU, G: FE 930826-0500)                                        | MK028023 | N/A      | E Eurasia     | perennial | 4 | rotate | polycolpate | dry    | yes |
| <i>G. kinuta</i> Nakai & H. Hara (106M)                              | Japan: Nikko (WU: FE 930827-0102)                                                     | MK028026 | N/A      | E Eurasia     | perennial | 4 | rotate | polycolpate | dry    | no  |
| <i>G. linearifolium</i> Turcz. (133)                                 | China: Beijing (CAS: Changping Exp. 3, 15-6-2000)                                     | MK027990 | MK027861 | E Eurasia     | perennial | 4 | rotate | polycolpate | dry    | no  |
| <i>G. migrans</i> Ehrend. & McGill. (120M)                           | Australia: Cape Le Grand (G: S. Pignatti 719)                                         | MK028036 | N/A      | Australia     | perennial | 4 | rotate | polycolpate | dry    | no  |
| <i>G. multiflorum</i> Kellogg (65)                                   | USA: California, S Topaz Lake (WU: FE 52, 28.7.1999)                                  | MK027939 | MK027800 | North America | perennial | 4 | rotate | polycolpate | dry    | no  |
| <i>G. richardianum</i> (Gillies ex Hook. & Arn.) Endl. ex Walp. (93) | Argentina: Cordoba (WU: FE 107, 18.2.1998 [as “ <i>Relbunium richardianum</i> ”])     | MK027958 | MK027824 | South America | perennial | 4 | rotate | polycolpate | dry    | no  |
| <i>G. rotundifolium</i> L. (17M)                                     | France: Corsica, Loreto di Casinca (G: D. Jeanmonod & A. Natali J4979)                | MK028055 | N/A      | Europe        | perennial | 4 | rotate | polycolpate | dry    | yes |
| <i>G. rubioides</i> L. (75M_GB4)                                     | Switzerland: Geneva, Bot. Garden (G: A. Natali & J.-F. Manen 013, Geneva Bot. Garden) | MK028094 | N/A      | Europe        | perennial | 4 | rotate | polycolpate | dry    | no  |
| <i>G. scabrum</i> L. (07M_GB12)                                      | France: Corsica, Porto (G: D. Jeanmonod & D. Roguet J4961)                            | MK028019 | N/A      | Mediterranean | perennial | 4 | rotate | polycolpate | dry    | yes |
| <i>G. septentrionale</i> Roem. & Schult. (45M_GB3)                   | USA: Colorado (G: A. Natali & J.-F. Manen 016)                                        | MK028074 | N/A      | North America | perennial | 4 | rotate | polycolpate | dry    | no  |

|                                              |                                                                     |          |          |               |           |   |        |             |        |     |
|----------------------------------------------|---------------------------------------------------------------------|----------|----------|---------------|-----------|---|--------|-------------|--------|-----|
| <i>G. sparsiflorum</i> W. Wight (67)         | USA: California, Mariposa (WU: FE 40, 26.7.1999 [as “grande 4-na”]) | MK027941 | MK027801 | North America | perennial | 4 | rotate | polycolpate | fleshy | no  |
| <i>G. trichocarpum</i> DC. (73)              | Chile: Tiltit (WU: FE 12, 19.1.1998 [as “Galium lateramosum”])      | MK027946 | MK027806 | South America | perennial | 4 | rotate | polycolpate | dry    | no  |
| <i>G. yunnanense</i> H. Hara & C.Y. Wu (146) | China: Yunnan, Gongshan (WU, CAS: Gaoligong Shan 33243)             | MK028002 | N/A      |               |           |   |        |             |        |     |
| <i>G. yunnanense</i> H. Hara & C.Y. Wu (147) | China: Yunnan, Songming Xian (WU, GH: Boufford et al. 34983)        | MK028003 | MK027874 | E Eurasia     | perennial | 4 | rotate | polycolpate | dry    | yes |

**sect. *Trachygalium***

|                                    |                                                                                       |          |          |           |           |           |        |             |     |    |
|------------------------------------|---------------------------------------------------------------------------------------|----------|----------|-----------|-----------|-----------|--------|-------------|-----|----|
| <i>G. acutum</i> Edgew. (150)      | China: Sichuan, Dujiangyan (WU, GH: Boufford et al., 24796)                           | MK028006 | N/A      | E Eurasia | perennial | 6 or more | rotate | polycolpate | dry | no |
| <i>G. asperifolium</i> Wall. (111) | China: Yunnan, Fugong Xian (WU, CAS: Gaoligong Shan 27567 [as “Galium asperuloides”]) | MK027969 | MK027840 |           |           |           |        |             |     |    |
| <i>G. asperifolium</i> Wall. (112) | China: Yunnan, Gongshan (WU, CAS: Gaoligong Shan 33268 [as “Galium asperuloides”])    | MK027970 | MK027841 |           |           |           |        |             |     |    |
| <i>G. asperifolium</i> Wall. (113) | China: Sichuan, Yajiang Xian (WU, GH: Boufford et al. 35940 [as “Galium sikkimense”]) | MK027971 | MK027842 | E Eurasia | perennial | 6 or more | rotate | polycolpate | dry | no |
| <i>G. asperifolium</i> Wall. (114) | China: Xizang (Tibet), Jiangda Xian (WU, GH: Boufford et al. 31222)                   | MK027972 | MK027843 |           |           |           |        |             |     |    |
| <i>G. asperifolium</i> Wall. (36)  | China: Kunming (WU: FE, 27.7.2006)                                                    | MK027916 | MK027779 | E Eurasia | perennial | 6 or more | rotate | polycolpate | dry | no |
| <i>G. blinii</i> H. Lév. (115)     | China: Yunnan, Fugong Xian (WU, CAS: Gaoligong Shan 26993)                            | MK027973 | MK027844 | E Eurasia | perennial | 6 or more | rotate | polycolpate | dry | no |

|                                                                   |                                                                                                                            |          |          |               |           |           |        |             |     |     |
|-------------------------------------------------------------------|----------------------------------------------------------------------------------------------------------------------------|----------|----------|---------------|-----------|-----------|--------|-------------|-----|-----|
| <i>G. blinii</i> H. Lév. (37)                                     | China: Lake Bitu (WU: FE, 02.8.2006 [as “ <i>Galium luisae</i> ”])                                                         | MK027917 | N/A      | E Eurasia     | perennial | 6 or more | rotate | polycarpate | dry | no  |
| <i>G. dahuricum</i> Turcz. ex Ledeb. (118)                        | China: Sichuan, Nanchuan Co. (CAS: Liu Zheng-yu 17748)                                                                     | MK027976 | MK027847 | E Eurasia     | perennial | 6 or more | rotate | polycarpate | dry | no  |
| <i>G. dahuricum</i> Turcz. ex Ledeb. (33)                         | China: Shaanxi, Taibai Mts. (WU: FE, 19.8.2006)                                                                            | MK027913 | MK027776 | E Eurasia     | perennial | 6 or more | rotate | polycarpate | dry | no  |
| <i>G. glabriusculum</i> Ehrend. ( <i>G. smithii</i> Cuf.) (144)   | China: Xizang (Tibet), Jiangda Xian (WU, GH: Boufford et al. 31706)                                                        | MK028000 | MK027872 | E Eurasia     | perennial | 6 or more | rotate | polycarpate | dry | yes |
| <i>G. megacyttarion</i> R.R. Mill (137)                           | China: Sichuan (WU: FE 27161)                                                                                              | MK027993 | MK027865 | E Eurasia     | perennial | 6 or more | rotate | polycarpate | dry | no  |
| <i>G. mexicanum</i> subsp. <i>aspermum</i> (A.Gray) Dempster (68) | USA: Mariposa: Midpine (WU: FE 35, 26.7.1999 [as “ <i>Galium aspermum</i> ”])                                              | MK027942 | MK027802 | North America | perennial | 6 or more | rotate | polycarpate | dry | no  |
| <i>G. prattii</i> Cufod. (142)                                    | China: Sichuan, Shimian Xian (WU: Boufford et al. 32812)                                                                   | MK027998 | MK027870 | E Eurasia     | perennial | 6 or more | rotate | polycarpate | dry | no  |
| <i>G. prattii</i> Cufod./ <i>G. blinii</i> H. Lév. (141)          | China: Sichuan, Luding Xian (WU, GH: Boufford et al. 27309)                                                                | MK027997 | MK027869 | E Eurasia     | perennial | 6 or more | rotate | polycarpate | dry | no  |
| <i>G. pseudoasprellum</i> Makino (100M_250)                       | Japan: Mt. Fuji (WU, G: FE 930910-3801)                                                                                    | MK028022 | N/A      |               |           |           |        |             |     |     |
| <i>G. pseudoasprellum</i> Makino (108M)                           | Japan, Hakuba (WU: FE 930904-1501)                                                                                         | MK028027 | N/A      |               |           |           |        |             |     |     |
| <i>G. pseudoasprellum</i> Makino (117)                            | China: Qinghai, Nanqen Xian (PE, CAS, E: Ho et al. 2535 [as “ <i>Galium dahuricum</i> var. <i>lasiocarpum</i> ”])          | MK027975 | MK027846 |               |           |           |        |             |     |     |
| <i>G. pseudoasprellum</i> Makino (119)                            | Russia: Vladivostok (PE: Pl. Vasc. Or. Extr. Ross. Exsiccata 614 [as “ <i>Galium dahuricum</i> var. <i>lasiocarpum</i> ”]) | MK027977 | MK027848 | E Eurasia     | perennial | 6 or more | rotate | polycarpate | dry | yes |

|                                       |                                                                                                                  |          |          |                           |           |           |         |             |     |     |
|---------------------------------------|------------------------------------------------------------------------------------------------------------------|----------|----------|---------------------------|-----------|-----------|---------|-------------|-----|-----|
| <i>G. pseudoasprellum</i> Makino (35) | China: Taibai Mt., Red River valley (WU: FE, 18.8.2006 [as “ <i>Galium dahuricum</i> var. <i>lasiocarpum</i> ”]) | MK027915 | MK027778 | E Eurasia                 | perennial | 6 or more | rotate  | polycolpate | dry | yes |
| <i>G. pseudoasprellum</i> Makino (39) | China: Zhongdian (WU: FE, 05.8.2006 [as “ <i>Galium dahuricum</i> var. <i>lasiocarpum</i> ”])                    | MK027919 | MK027781 | E Eurasia                 | perennial | 6 or more | rotate  | polycolpate | dry | yes |
| <i>G. rebae</i> R.R. Mill (143)       | China: Yunnan, Gongshan Xian (CAS: Gaoligong Shan 16976, 4.10.2002)                                              | MK027999 | MK027871 | E Eurasia                 | perennial | 6 or more | rotate  | polycolpate | dry | no  |
| <i>G. rivale</i> (Sm.) Griseb. (52)   | Slowakei (WU: FE, 16.6.2002)                                                                                     | MK027932 | N/A      | Europe                    | perennial | 6 or more | tubular | polycolpate | dry | no  |
| <i>G. sungpanense</i> Cufod. (145)    | China: Sichuan, Baiyu Xian (WU, GH: Boufford et al. 37009)                                                       | MK028001 | MK027873 | E Eurasia                 | perennial | 6 or more | rotate  | polycolpate | dry | yes |
| <i>G. triflorum</i> Michx. (21)       | USA: West Virginia, Shenandoah Mts. (WU: FE, 8.5.2007)                                                           | MK027901 | MK027764 | E Eurasia & North America | perennial | 6 or more | rotate  | polycolpate | dry | yes |
| <i>G. triflorum</i> Michx. (69)       | USA: California, Coast Ranges S of San Francisco (WU: FE 3, 22.7.1999)                                           | MK027943 | MK027803 |                           |           |           |         |             |     |     |
| <i>G. uliginosum</i> L. (53)          | Slowakei (WU: FE, 16.6.2002)                                                                                     | MK027933 | MK027791 |                           |           |           |         |             |     |     |
| <i>G. uliginosum</i> L. (96)          | Austria: Kärnten, St. Georgen (WU: FE, 25.7.1998)                                                                | MK027960 | MK027827 |                           |           |           |         |             |     |     |
| <i>G. uliginosum</i> L. (99)          | Austria: Kärnten, St. Georgen (WU: FE, 25.7.1998)                                                                | MK027961 | MK027830 | Europe                    | perennial | 6 or more | rotate  | polycolpate | dry | no  |

### *Kelloggia*

|                                    |                                                                  |          |          |           |           |                      |         |           |     |     |
|------------------------------------|------------------------------------------------------------------|----------|----------|-----------|-----------|----------------------|---------|-----------|-----|-----|
| <i>K. chinensis</i> Franch. (149)  | China: Sichuan, Xiangcheng Xian (GH, CAS: Boufford et al. 28360) | MK028005 | MK027876 | E Eurasia | perennial | 2 + 2 small stipules | tubular | 3-colpate | dry | yes |
| <i>K. chinensis</i> Franch. (GB34) | China: Yunnan, Zhongdian, Napaihai (KUN:)                        | AY570765 | N/A      |           |           |                      |         |           |     |     |

|                                                |                                                                                                                  |          |     |               |           |                         |         |             |     |     |
|------------------------------------------------|------------------------------------------------------------------------------------------------------------------|----------|-----|---------------|-----------|-------------------------|---------|-------------|-----|-----|
| <i>K. chinensis</i> Franch.<br>(GB35)          | China: Xizang, Mangkang<br>(F:)                                                                                  | AY570764 | N/A |               |           |                         |         |             |     |     |
| <i>K. galioides</i> Torr.<br>(GB32_8865)       | USA: California, Warner<br>Mt. (CAS, KUN)                                                                        | AY570768 | N/A | North America | perennial | 2 + 2 small<br>stipules | tubular | 3-colpate   | dry | yes |
| <i>K. galioides</i> Torr.<br>(GB33)            | USA: California, Modoc<br>Mt. (CAS, KUN)                                                                         | AY570766 | N/A |               |           |                         |         |             |     |     |
| <i>Mericarpaea</i>                             |                                                                                                                  |          |     |               |           |                         |         |             |     |     |
| <i>M. ciliata</i> (Banks &<br>Sol.) Eig (166M) | Israel: Samarian Desert (G:<br>A. Danin et al. It. 08062 [as<br>“ <i>Mericarpaea</i><br><i>vaillantoides</i> ”]) | MK028054 | N/A | SW Asia       | annual    | 6 or more               | rotate  | polycolpate | dry | yes |

| Phuopsis                                                                |                                                                                                        |          |          |                       |           |             |         |             |        |    |  |
|-------------------------------------------------------------------------|--------------------------------------------------------------------------------------------------------|----------|----------|-----------------------|-----------|-------------|---------|-------------|--------|----|--|
| P. stylosa (Trin.)<br>Benth. & Hook. f. ex<br>B.D. Jacks.<br>(35M_GB38) | Switzerland: Geneva, Bot.<br>Garden (G: A. Natali & J.-F.<br>Manen s.n., Geneva Bot.<br>Garden 916798) | MK028073 | N/A      | SW Asia               | perennial | 6 or more   | tubular | polycolpate | dry    | no |  |
| Rubia                                                                   |                                                                                                        |          |          |                       |           |             |         |             |        |    |  |
| sect. Oligoneura                                                        |                                                                                                        |          |          |                       |           |             |         |             |        |    |  |
| R. cordifolia L.<br>(103M)                                              | Japan: Nikko (WU, G: F.<br>Erhrendorfer & HB 930825-<br>0101)                                          | MK028025 | N/A      |                       |           |             |         |             |        |    |  |
| R. cordifolia L.<br>(109M)                                              | China: South China Bot.<br>Garden Gouangzhou (CAS,<br>WU: C.T. Chen 9404002)                           | MK028028 | N/A      | E Eurasia &<br>Africa | perennial | 4_6 or more | rotate  | polycolpate | fleshy | no |  |
| R. cordifolia L. (87M)                                                  | Tanzania (WU, G: C. Puff<br>860816-1/16)                                                               | MK028103 | N/A      |                       |           |             |         |             |        |    |  |
| R. pseudogalium<br>Ehrend. (163)                                        | China: Yunnan, Bawan<br>Xian (CAS, WU: Gaoligong<br>Shan 23837)                                        | MK028011 | MK027881 | E Eurasia             | perennial | 4           | rotate  | polycolpate | fleshy | no |  |
| R. pseudogalium<br>Ehrend. (164)                                        | China: Yunnan, Tengchong<br>(CAS, WU: Gaoligong Shan<br>29209)                                         | MK028012 | MK027882 |                       |           |             |         |             |        |    |  |
| R. yunnanensis Diels<br>(138)                                           | China: Yunnan, Longyang<br>Qu (CAS: Gaoligong Shan<br>18294)                                           | MK027994 | MK027866 | E Eurasia             | perennial | 4_6 or more | rotate  | polycolpate | fleshy | no |  |
| sect. Rubia                                                             |                                                                                                        |          |          |                       |           |             |         |             |        |    |  |
| R. danaensis Danin<br>(72)                                              | Jordan: Shobak (WU: FE,<br>16.4.2000)                                                                  | N/A      | MK027805 | Mediterranean         | perennial | 6 or more   | rotate  | polycolpate | fleshy | no |  |
| R. laurae (Holmboe)<br>Airy Shaw (134M)                                 | Cyprus: Nata-Axilou (G:<br>Iter Mediterranea IV 1043)                                                  | MK028048 | N/A      | Mediterranean         | perennial | 4           | rotate  | polycolpate | fleshy | no |  |
| R. peregrina L.<br>(33M_GB30)                                           | Italy: Elba Island (G: A.<br>Natali & M.-A. Thiébaud<br>56965)                                         | MK028071 | N/A      | Mediterranean         | perennial | 6 or more   | rotate  | polycolpate | fleshy | no |  |
| R. tenuifolia d'Urv.<br>(40)                                            | Lebanon: Beit Meri (WU:<br>FE, 22.3.2005)                                                              | MK027920 | MK027782 | Mediterranean         | perennial | 6 or more   | rotate  | polycolpate | fleshy | no |  |
| R. tenuifolia d'Urv.<br>(130M)                                          | Cyprus: Cape Kiti (G: Iter<br>Mediterranea IV 295)                                                     | MK028044 | N/A      |                       |           |             |         |             |        |    |  |

|                                                               |                                                                                                        |          |     |               |           |           |         |             |        |    |
|---------------------------------------------------------------|--------------------------------------------------------------------------------------------------------|----------|-----|---------------|-----------|-----------|---------|-------------|--------|----|
| <i>R. tinctorum</i> L.<br>(11M_GB29)                          | Switzerland: Geneva, Bot.<br>Garden (G: A. Natali & J.-F.<br>Manen s.n., Geneva Bot.<br>Garden 916690) | MK028035 | N/A | SW Asia       | perennial | 6 or more | rotate  | polycolpate | fleshy | no |
| <b><i>Sherardia</i></b>                                       |                                                                                                        |          |     |               |           |           |         |             |        |    |
| <i>S. arvensis</i> L.<br>(02M_GB31)                           | France: Corsica, St Petrone<br>(G: D. Jeanmonod & A.<br>Natali J5048)                                  | MK028014 | N/A | Mediterranean | annual    | 6 or more | tubular | polycolpate | dry    | no |
| <i>S. arvensis</i> L. (05M)                                   | Switzerland: Geneva, Bot.<br>Garden (G: A. Natali & J.-F.<br>Manen 007, Geneva Bot.<br>Garden)         | MK028017 | N/A | Mediterranean | annual    | 6 or more | tubular | polycolpate | dry    | no |
| <b><i>Valantia</i></b>                                        |                                                                                                        |          |     |               |           |           |         |             |        |    |
| <i>V. aprica</i> (Sibth. &<br>Sm.) Boiss. & Heldr.<br>(R281M) | Greece: Sterea Ellas,<br>Parnassos, Fterolalka (G,<br>GE: A. Charpin 22.218)                           | MK028112 | N/A | Mediterranean | perennial | 4         | rotate  | polycolpate | dry    | no |
| <i>V. calva</i> Brullo<br>(R280M)                             | Italy: Sicilia, Linosa, Monte<br>Vulcano (G, GE: S. Brullo<br>s.n., 20.4.1977)                         | MK028111 | N/A | Mediterranean | annual    | 4         | rotate  | polycolpate | dry    | no |
| <i>V. deltoidea</i> Brullo<br>(503M_R503M)                    | Italy: Sicilia, Palermo,<br>Rocca Busambra (PAL: L.<br>Robba 7)                                        | MK028077 | N/A | Mediterranean | annual    | 4         | rotate  | polycolpate | dry    | no |
| <i>V. hispida</i> L. (132M)                                   | Cyprus: Amathus (G: Iter<br>Mediterranea IV 314)                                                       | MK028046 | N/A | Mediterranean | annual    | 4         | rotate  | polycolpate | dry    | no |
| <i>V. muralis</i> L.<br>(32M_GB39)                            | France: Corsica, Pigno (G:<br>D. Jeanmonod & A. Natali<br>s.n.)                                        | MK028070 | N/A | Mediterranean | annual    | 4         | rotate  | polycolpate | dry    | no |

<sup>a</sup>FE = F. Ehrendorfer
